# Supplementary material
Source: MDPI journal article supplement (https://www.mdpi.com/2673-4095/2/3/29)
Supplement: s1 [file s1]

Archive with 1 entries (1 files):
- surgeries-1283609-supplementary.pdf
