# Supplementary material
Source: MDPI journal article supplement (https://www.mdpi.com/2673-4095/2/3/29)
Supplement: s1 [file s1 › surgeries-1283609-supplementary.pdf]

# Supplementary Materials: Identifying Consensus and Open Questions around Assessing or Predicting the Quality and Success of Cartilage Repair: A Delphi Study

Timothy Hopkins <sup>1,2,\*</sup>, James Richardson <sup>1,2,†</sup> and Jan Herman Kuiper <sup>1,2</sup>

<sup>1</sup> School of Pharmacy and Bioengineering, Keele University, Staffordshire, ST5 5BG, UK; james.richardson@nhs.net (J.R.); j.h.kuiper@keele.ac.uk (J.H.K.)

<sup>2</sup> Robert Jones and Agnes Hunt Orthopaedic Hospital, Shropshire, SY10 7AG, UK

\* Correspondence: t.hopkins@keele.ac.uk; Tel.: +44-1691-404699

† Deceased.

**Supplementary Table S1.** A full list of the Likert-scale-rated single statements and results from the round 2 questionnaire.

| Statement                                                                                                               | Round 2 Statement Number | None (n) | Somewhat (n) | Middling (n) | Largely (n) | Completely (n) | Total answers (n) | Median | % Positive | IQR | Consensus Reached? |
|-------------------------------------------------------------------------------------------------------------------------|--------------------------|----------|--------------|--------------|-------------|----------------|-------------------|--------|------------|-----|--------------------|
| The size and depth of the lesion should both be measured.                                                               | 1a                       | 0        | 1            | 0            | 4           | 18             | 23                | C      | 95.65      | 0   | ✓                  |
| We should measure the lacunae (cysts) in the bone.                                                                      | 1b                       | 1        | 5            | 3            | 3           | 9              | 21                | L      | 57.14      | 3   | X                  |
| We should measure the area of bone marrow oedema-like (BML) signal.                                                     | 1c                       | 2        | 5            | 3            | 4           | 6              | 20                | M/L    | 50         | 3   | X                  |
| We should take disease status (e.g. synovial fibrosis, bone sclerosis, inflammation) into account for efficient repair. | 2a                       | 0        | 1            | 0            | 2           | 21             | 24                | C      | 95.83      | 0   | ✓                  |
| Patients should be better stratified prior to clinical trial entry.                                                     | 2b                       | 0        | 1            | 2            | 8           | 13             | 24                | C      | 87.5       | 1   | ✓                  |
| Environmental factors are important in influencing repair (e.g. age, exercise, gender).                                 | 2c                       | 0        | 0            | 0            | 9           | 15             | 24                | C      | 100        | 1   | ✓                  |
| Access to specialist rehabilitation programs would be useful for all patients, pre- and post- cartilage repair.         | 3                        | 0        | 1            | 3            | 6           | 14             | 24                | C      | 83.33      | 1   | ✓                  |
| An increase in collagen type II expression is a key marker of cartilage quality in pellet culture.                      | 4a                       | 0        | 1            | 2            | 9           | 10             | 22                | L      | 86.36      | 1   | ✓                  |

|                                                                                                                                                          |     |   |   |    |    |    |    |     |       |      |   |
|----------------------------------------------------------------------------------------------------------------------------------------------------------|-----|---|---|----|----|----|----|-----|-------|------|---|
| An increase in collagen type II expression is a key marker of cartilage quality in animal models.                                                        | 4b  | 0 | 0 | 0  | 10 | 12 | 22 | C   | 100   | 1    | ✓ |
| An increase in collagen type II expression is a key marker of cartilage quality in humans.                                                               | 4c  | 0 | 1 | 1  | 7  | 14 | 23 | C   | 91.30 | 1    | ✓ |
| An increase in aggrecan expression is a key marker of cartilage quality in pellet culture.                                                               | 5a  | 0 | 1 | 4  | 9  | 8  | 22 | L   | 77.27 | 1    | X |
| An increase in aggrecan expression is a key marker of cartilage quality in animal models.                                                                | 5b  | 0 | 1 | 1  | 12 | 8  | 22 | L   | 90.91 | 1    | ✓ |
| An increase in aggrecan expression is a key marker of cartilage quality in humans.                                                                       | 5c  | 0 | 2 | 2  | 10 | 9  | 23 | L   | 82.61 | 1    | ✓ |
| An increase in lubricin expression is a key marker of cartilage quality in pellet culture.                                                               | 6a  | 0 | 0 | 6  | 9  | 5  | 20 | L   | 70    | 1.25 | X |
| An increase in lubricin expression is a key marker of cartilage quality in animal models.                                                                | 6b  | 0 | 0 | 5  | 11 | 5  | 21 | L   | 76.19 | 0    | X |
| An increase in lubricin expression is a key marker of cartilage quality in humans.                                                                       | 6c  | 0 | 1 | 4  | 10 | 7  | 22 | L   | 77.27 | 1    | X |
| Any functional fibrocartilage is sufficient.                                                                                                             | 7   | 3 | 5 | 10 | 3  | 3  | 24 | M   | 25    | 1.25 | X |
| Hyaline cartilage is absolutely necessary.                                                                                                               | 8   | 2 | 0 | 6  | 10 | 6  | 24 | L   | 66.67 | 1.25 | X |
| Collagen type X expression should not be present at mRNA level.                                                                                          | 9   | 2 | 2 | 10 | 6  | 3  | 23 | M   | 39.13 | 1    | X |
| Collagen type X expression should not be present in the repair.                                                                                          | 10  | 1 | 1 | 7  | 9  | 4  | 22 | L   | 59.09 | 1    | X |
| Measuring cartilage changes is irrelevant, the pathogenic mechanisms that lead to the changes are more important and may be largely cartilage dependant. | 11  | 3 | 6 | 8  | 4  | 1  | 22 | M   | 22.72 | 1    | X |
| Collagen type VI is a useful marker for cartilage repair quality.                                                                                        | 12  | 2 | 0 | 4  | 0  | 8  | 14 | C   | 57.14 | 2    | X |
| A more extensive histology scoring system is needed for pellet culture.                                                                                  | 13a | 4 | 1 | 6  | 5  | 6  | 22 | M   | 50    | 1.5  | X |
| A more extensive histology scoring system is needed for animal models.                                                                                   | 13b | 4 | 2 | 2  | 8  | 8  | 24 | L   | 66.67 | 2.25 | X |
| A more extensive histology scoring system is needed for human tissue.                                                                                    | 13c | 4 | 2 | 2  | 7  | 9  | 24 | L   | 66.67 | 2.25 | X |
| A simpler scoring system is best for MRI in animal models.                                                                                               | 14a | 1 | 2 | 7  | 5  | 5  | 20 | M/L | 50    | 1.25 | X |

|                                                                                                                                |     |   |   |   |    |    |    |     |       |     |   |
|--------------------------------------------------------------------------------------------------------------------------------|-----|---|---|---|----|----|----|-----|-------|-----|---|
| A simpler scoring system is best for MRI in human research.                                                                    | 14b | 2 | 3 | 7 | 5  | 6  | 23 | M   | 47.82 | 1.5 | X |
| Scoring systems should include both structural and inflammatory features in animal models.                                     | 15a | 2 | 2 | 3 | 8  | 6  | 21 | L   | 66.67 | 2   | X |
| Scoring systems should include both structural and inflammatory features in human research.                                    | 15b | 2 | 2 | 2 | 9  | 8  | 23 | L   | 73.91 | 1.5 | X |
| It is important to assess all tissues in the joint in animal models.                                                           | 16a | 0 | 0 | 5 | 10 | 9  | 24 | L   | 79.17 | 2   | X |
| It is important to assess all tissues in the joint in human research.                                                          | 16b | 0 | 0 | 4 | 8  | 12 | 24 | L/C | 83.33 | 1.5 | ✓ |
| Non-invasive measures provide a way to reduce time and cost.                                                                   | 19  | 1 | 1 | 5 | 5  | 12 | 24 | L/C | 70.83 | 1   | X |
| The advancement of the bone front is negative.                                                                                 | 21  | 1 | 2 | 9 | 2  | 3  | 17 | M   | 29.41 | 1   | X |
| It is important to assess the identity and quality of both repair cartilage and the bone-cartilage interface in animal models. | 23a | 0 | 0 | 2 | 8  | 13 | 23 | C   | 91.30 | 2   | ✓ |
| It is important to assess the identity and quality of both repair cartilage and the bone-cartilage interface in humans.        | 23b | 0 | 1 | 4 | 7  | 11 | 23 | L   | 78.26 | 1   | X |
| The repair has an effect on the surrounding cells in animal models.                                                            | 24a | 0 | 0 | 5 | 5  | 13 | 23 | C   | 78.26 | 1   | X |
| The repair has an effect on the surrounding cells in humans.                                                                   | 24b | 0 | 0 | 5 | 5  | 13 | 23 | C   | 78.26 | 1   | X |
| Determining the mechanism of damage repair response is important in animal models.                                             | 25a | 0 | 2 | 2 | 6  | 13 | 22 | C   | 90.91 | 1   | ✓ |
| Determining the mechanism of damage repair response is important in human research.                                            | 25b | 0 | 2 | 2 | 6  | 13 | 23 | C   | 82.61 | 1   | ✓ |
| MRI should be used in short bursts to keep costs down in animal models.                                                        | 26a | 2 | 2 | 5 | 6  | 2  | 17 | M   | 47.06 | 1   | X |
| MRI should be used in short bursts to keep costs down in human research.                                                       | 26b | 1 | 1 | 8 | 5  | 2  | 17 | M   | 41.18 | 1   | X |
| Treatment costs should be justifiable.                                                                                         | 27  | 0 | 1 | 2 | 7  | 13 | 23 | C   | 86.96 | 1   | ✓ |

|                                                                                                                     |    |   |   |   |   |    |    |   |       |     |   |
|---------------------------------------------------------------------------------------------------------------------|----|---|---|---|---|----|----|---|-------|-----|---|
| Any technique or product for cartilage repair has to be scalable.                                                   | 28 | 0 | 2 | 4 | 9 | 8  | 23 | L | 73.91 | 1.5 | X |
| The cell type should raise as few ethical and safety issues as possible.                                            | 29 | 3 | 4 | 5 | 3 | 8  | 23 | L | 47.83 | 2   | X |
| Laboratory research should push the boundaries, not slow down for clinics. There is a need for clinical innovation. | 30 | 0 | 1 | 1 | 8 | 13 | 23 | C | 91.30 | 1   | ✓ |
| More investment in cell therapies is needed.                                                                        | 31 | 0 | 1 | 4 | 5 | 13 | 23 | C | 78.26 | 1   | X |

Supplementary Table S2. A full list of the Likert-scale-rated single statements and results from the round 3 questionnaire.

| Statement                                                                                  | Round 3 Statement Number | None (n) | Somewhat (n) | Middling (n) | Largely (n) | Completely (n) | Total answers (n) | Median | % Positive | IQR  | Consensus Reached? |
|--------------------------------------------------------------------------------------------|--------------------------|----------|--------------|--------------|-------------|----------------|-------------------|--------|------------|------|--------------------|
| We should measure the lacunae (cysts) in the bone.                                         | 1a                       | 1        | 1            | 4            | 3           | 6              | 15                | L      | 60.00      | 2    | X                  |
| We should measure the area of bone marrow oedema-like (BML) signal.                        | 1b                       | 0        | 2            | 3            | 5           | 4              | 14                | L      | 64.29      | 1.75 | X                  |
| An increase in aggrecan expression is a key marker of cartilage quality in pellet culture. | 2a                       | 0        | 0            | 0            | 8           | 7              | 15                | L      | 100        | 1    | ✓                  |
| An increase in lubricin expression is a key marker of cartilage quality in pellet culture. | 3a                       | 0        | 0            | 7            | 4           | 2              | 13                | M      | 46.15      | 1    | X                  |
| An increase in lubricin expression is a key marker of cartilage quality in animal models.  | 3b                       | 0        | 0            | 3            | 11          | 1              | 15                | L      | 80.00      | 0    | ✓                  |
| An increase in lubricin expression is a key marker of cartilage quality in humans.         | 3c                       | 0        | 0            | 3            | 9           | 3              | 15                | L      | 80.00      | 0    | ✓                  |
| Any functional fibrocartilage is sufficient.                                               | 4                        | 0        | 4            | 6            | 3           | 2              | 15                | M      | 33.33      | 1.5  | X                  |
| Hyaline cartilage is absolutely necessary.                                                 | 5                        | 1        | 1            | 3            | 7           | 3              | 15                | L      | 66.67      | 1    | X                  |
| Collagen type X expression should not be present in the repair at mRNA level.              | 6                        | 0        | 4            | 6            | 5           | 0              | 15                | M      | 33.33      | 1.5  | X                  |
| Collagen type X expression should not be present in the repair.                            | 7                        | 0        | 2            | 5            | 7           | 1              | 15                | L      | 53.33      | 1    | X                  |
| Measuring cartilage changes is irrelevant, the pathogenic mechanisms that lead to the      | 8                        | 3        | 4            | 5            | 2           | 1              | 15                | M      | 20.00      | 1    | X                  |

|                                                                                                                             |     |   |   |   |   |    |    |     |       |     |   |
|-----------------------------------------------------------------------------------------------------------------------------|-----|---|---|---|---|----|----|-----|-------|-----|---|
| changes are more important and may be largely cartilage dependant.                                                          |     |   |   |   |   |    |    |     |       |     |   |
| Collagen type VI is a useful marker for cartilage repair quality.                                                           | 9   | 0 | 2 | 6 | 1 | 6  | 15 | M   | 46.67 | 2   | X |
| A more extensive histology scoring system is needed for pellet culture.                                                     | 10a | 1 | 2 | 4 | 4 | 4  | 15 | L   | 53.33 | 1.5 | X |
| A more extensive histology scoring system is needed for animal models.                                                      | 10b | 1 | 1 | 2 | 4 | 7  | 15 | L   | 73.33 | 1.5 | X |
| A more extensive histology scoring system is needed for human tissue.                                                       | 10c | 1 | 1 | 1 | 2 | 9  | 14 | C   | 78.57 | 1   | ✓ |
| A simpler scoring system is best for MRI in animal models.                                                                  | 11a | 1 | 0 | 6 | 6 | 1  | 14 | M/L | 50.00 | 1   | X |
| A simpler scoring system is best for MRI in human research.                                                                 | 11b | 1 | 0 | 7 | 5 | 1  | 14 | M   | 42.86 | 1   | X |
| Scoring systems should include both structural and inflammatory features in animal models.                                  | 12a | 0 | 0 | 1 | 8 | 5  | 14 | L   | 92.86 | 1   | ✓ |
| Scoring systems should include both structural and inflammatory features in human research.                                 | 12b | 0 | 0 | 1 | 7 | 7  | 15 | L   | 93.33 | 1   | ✓ |
| It is important to assess all tissues in the joint in animal models.                                                        | 13  | 0 | 0 | 1 | 3 | 11 | 15 | C   | 93.33 | 0.5 | ✓ |
| Non-invasive measures provide a way to reduce time and cost.                                                                | 14  | 0 | 0 | 1 | 0 | 14 | 15 | C   | 93.33 | 0   | ✓ |
| The advancement of the bone front is negative.                                                                              | 15  | 0 | 0 | 8 | 4 | 2  | 14 | M   | 42.86 | 1   | X |
| It is important to assess the identity and quality of both the repair cartilage and the bone-cartilage interface in humans. | 16  | 0 | 0 | 0 | 4 | 11 | 15 | C   | 100   | 0.5 | ✓ |
| The repair has an effect on the surrounding cells in animal models.                                                         | 17a | 0 | 0 | 0 | 2 | 13 | 15 | C   | 100   | 0   | ✓ |
| The repair has an effect on the surrounding cells in humans.                                                                | 17b | 0 | 0 | 0 | 2 | 13 | 15 | C   | 100   | 0   | ✓ |
| MRI should be used in short bursts to keep costs down in animal models.                                                     | 18a | 1 | 0 | 8 | 4 | 0  | 13 | M   | 30.77 | 1   | X |
| MRI should be used in short bursts to keep costs down in human research.                                                    | 18b | 1 | 2 | 7 | 2 | 1  | 13 | M   | 23.08 | 0   | X |

|                                                                          |    |   |   |   |   |    |    |   |       |   |   |
|--------------------------------------------------------------------------|----|---|---|---|---|----|----|---|-------|---|---|
| Any technique or product for cartilage repair has to be scalable.        | 19 | 0 | 0 | 0 | 7 | 8  | 15 | C | 100   | 1 | ✓ |
| The cell type should raise as few ethical and safety issues as possible. | 20 | 0 | 0 | 1 | 5 | 9  | 15 | C | 93.33 | 1 | ✓ |
| More investment in cell therapies is needed.                             | 21 | 0 | 0 | 1 | 1 | 12 | 14 | C | 92.86 | 0 | ✓ |

Supplementary Table S3. A full list of the statement series and results from the round 2 questionnaire'

| Round 2 Ranked Series     | Options                       | Number of respondents | Number that ranked as most important | Mean Rank | Mode Rank | Kendall's coefficient of concordance | Consensus Reached? |
|---------------------------|-------------------------------|-----------------------|--------------------------------------|-----------|-----------|--------------------------------------|--------------------|
| Tissue Type               | Cartilage                     | 24                    | 23                                   | 1.10      | 1         | 0.736                                | ✓                  |
|                           | Meniscus                      |                       | 1                                    | 4.21      | 5         |                                      |                    |
|                           | Fat Pad                       |                       | 0                                    | 5.79      | 6         |                                      |                    |
|                           | Subchondral Bone              |                       | 0                                    | 2.40      | 2         |                                      |                    |
|                           | Synovium (focal to defect)    |                       | 0                                    | 3.60      | 4         |                                      |                    |
|                           | Synovium (general)            |                       | 0                                    | 3.90      | 4         |                                      |                    |
| Treatment Choice Basis    | Patient Expectations          | 24                    | 12                                   | 2.13      | 1         | 0.049                                | X                  |
|                           | Clinician Expectations        |                       | 5                                    | 2.44      | 2         |                                      |                    |
|                           | Biomarkers                    |                       | 4                                    | 2.67      | 3         |                                      |                    |
|                           | Baseline                      |                       | 3                                    | 2.77      | 3         |                                      |                    |
| Repair Quality Assessment | Filling of defect area        | 20                    | 6                                    | 3.98      | 1         | 0.182                                | X                  |
|                           | Filling of defect depth       |                       | 0                                    | 4.73      | 2         |                                      |                    |
|                           | Quality measures by stiffness |                       | 0                                    | 6.60      | 10        |                                      |                    |
|                           | Lateral integration           |                       | 1                                    | 5.93      | 5         |                                      |                    |
|                           | Attachment to bone            |                       | 0                                    | 5.83      | 6         |                                      |                    |
|                           | Smooth surface                |                       | 0                                    | 7.15      | 9         |                                      |                    |
|                           | Low friction surface          |                       | 0                                    | 7.55      | 8         |                                      |                    |
|                           | Durability over time          |                       | 4                                    | 4.23      | 1         |                                      |                    |
|                           | Functionality (lack of pain)  |                       | 3                                    | 4.33      | 3         |                                      |                    |

|                                        |                                                |    |      |      |   |       |   |
|----------------------------------------|------------------------------------------------|----|------|------|---|-------|---|
| Functionality (delayed OA progression) |                                                | 3  | 4.70 | 7    |   |       |   |
| Treatment Outcome                      | Regain function                                | 24 | 9    | 1.96 | 2 | 0.172 | X |
|                                        | Movement without pain                          |    | 7    | 2.13 | 2 |       |   |
|                                        | Return to baseline (or better) quality of life |    | 3    | 2.92 | 3 |       |   |
|                                        | Patient specific goals                         |    | 4    | 3.00 | 4 |       |   |

Supplementary Table S4. A full list of the statement series and results from the round 3 questionnaire'

| Round 3 Ranked Series     | Options                                        | Number of respondents | Number that ranked as most important | Mean Rank | Mode Rank | Kendall's coefficient of concordance (W) | Consensus Reached? |
|---------------------------|------------------------------------------------|-----------------------|--------------------------------------|-----------|-----------|------------------------------------------|--------------------|
| Treatment Outcome         | Movement without pain                          | 15                    | 6                                    | 1.77      | 1         | 0.437                                    | X                  |
|                           | Return to baseline (or better) quality of life |                       | 0                                    | 3.10      | 3         |                                          |                    |
|                           | Patient specific goals                         |                       | 1                                    | 3.37      | 4         |                                          |                    |
|                           | Regain function                                |                       | 6                                    | 1.77      | 2         |                                          |                    |
| Treatment Choice Basis    | Biomarkers                                     | 15                    | 0                                    | 2.87      | 3         | 0.376                                    | X                  |
|                           | Patient expectations                           |                       | 10                                   | 1.73      | 1         |                                          |                    |
|                           | Baseline imaging                               |                       | 1                                    | 3.43      | 4         |                                          |                    |
|                           | Clinician expectations                         |                       | 3                                    | 1.97      | 2         |                                          |                    |
| Repair Quality Assessment | Attachment                                     | 15                    | 2                                    | 3.27      | 3         | 0.287                                    | X                  |
|                           | Stiffness                                      |                       | 1                                    | 4.27      | 5         |                                          |                    |
|                           | Durability                                     |                       | 6                                    | 2.23      | 1         |                                          |                    |
|                           | Filling                                        |                       | 1                                    | 2.53      | 2         |                                          |                    |
|                           | Surface                                        |                       | 1                                    | 4.80      | 6         |                                          |                    |
|                           | Lateral integration                            |                       | 0                                    | 3.90      | 4         |                                          |                    |
